# Supplementary material for: Enterococcus faecium L-15 Cell-Free Extract Improves the Chondrogenic Differentiation of Human Dental Pulp Stem Cells
Source: Int J Mol Sci. 2019 Jan 31;20(3):624. doi: 10.3390/ijms20030624 (PMC6386954; doi:10.3390/ijms20030624)
Supplement: Supplementary file 1 [file ijms-20-00624-s001.pdf]

## Supplementary materials

# *Enterococcus faecium* L-15 Cell-Free Extract Improves the Chondrogenic Differentiation of Human Dental Pulp Stem Cells

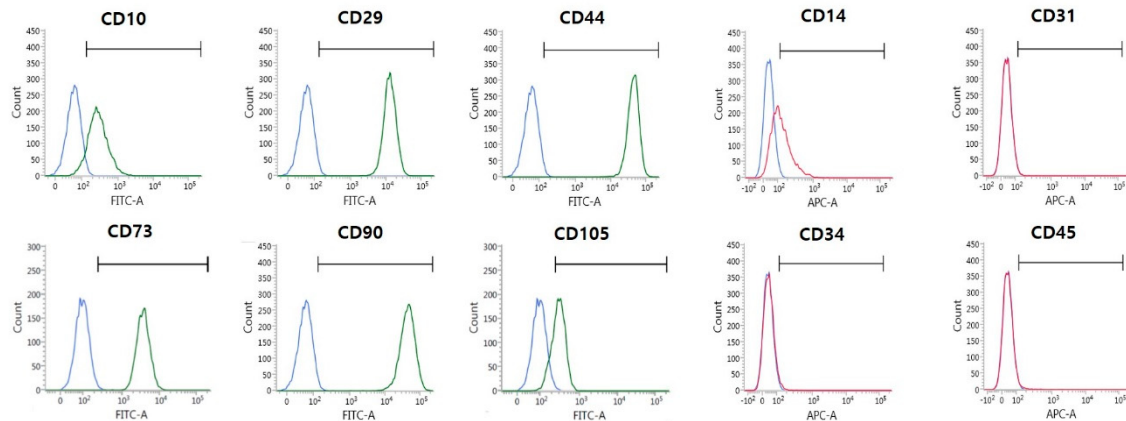

**Figure S1.** Characterization of hDPSCs at passage 8 by FACS analysis. Mesenchymal stem cell markers (90.05% CD10; 100% CD29; 100% CD44; 100% CD73; 100% CD90; 64.80% CD105) were highly expressed in hDPSCs compared to only a small degree of hematopoietic and endothelial marker expression (49.25% CD14; 1.33% CD31; 3.20% CD34; 2.37% CD45).

**Table 1.** Surface marker expression of hDPSCs at passage 4 by FACS analysis. Data are presented as average and standard deviation obtained from two donors.

| Markers | Average | Standard Deviation | n value<br>(Number of Donors) |
|---------|---------|--------------------|-------------------------------|
| CD10    | 92.48%  | 3.3                | 2                             |
| CD29    | 100%    | 0.0                | 2                             |
| CD44    | 100%    | 0.0                | 2                             |
| CD73    | 100%    | 0.0                | 2                             |
| CD90    | 100%    | 0.0                | 2                             |
| CD105   | 88.13%  | 7.77               | 2                             |
| CD14    | 20.11%  | 4.22               | 2                             |
| CD31    | 0.53%   | 0.23               | 2                             |
| CD34    | 1.24%   | 0.91               | 2                             |
| CD45    | 0.82%   | 0.37               | 2                             |

**Table 2.** Surface marker expression of hDPSCs at passage 8 by FACS analysis. Data are presented as average and standard deviation obtained from two donors.

| Markers | Average | Standard Deviation | n value<br>(Number of Donors) |
|---------|---------|--------------------|-------------------------------|
| CD10    | 90.05%  | 3.15               | 2                             |
| CD29    | 100%    | 0.0                | 2                             |
| CD44    | 100%    | 0.0                | 2                             |
| CD73    | 100%    | 0.0                | 2                             |

|       |        |       |   |
|-------|--------|-------|---|
| CD90  | 100%   | 0.0   | 2 |
| CD105 | 64.80% | 14.58 | 2 |
| CD14  | 49.25% | 8.365 | 2 |
| CD31  | 1.33%  | 0.795 | 2 |
| CD34  | 3.20%  | 1.78  | 2 |
| CD45  | 2.37%  | 1.885 | 2 |

**Table 3.** Primer sequences used for real-time PCR analysis.

| <b>Primer</b>  | <b>Forward Primer</b>    | <b>Reverse Primer</b>  |
|----------------|--------------------------|------------------------|
| <i>GAPDH</i>   | GCTCTCTGCTCCTCCCTGTTCTAG | TGGTAACCAGGCGTCCGAT    |
| <i>SOX9</i>    | AGCGAACGCACATCAAGAC      | CTGTAGGCGATCTGTTGGGG   |
| <i>COL2A1</i>  | GGCAATAGCAGGTTACGTACA    | CGATAACAGTCTTGCCCCACTT |
| <i>ACAN</i>    | GTGCCTATCAGGACAAGGTCT    | GATGCCTTTCACCACGACTTC  |
| <i>COL10A1</i> | CCCTCTTGTTAGTGCCAACC     | AGATTCCAGTCCTTGGGTCA   |
| <i>RUNX2</i>   | ATACCGAGTGACTTTAGGGATGC  | AGTGAGGGTGGAGGGAAGAAG  |
| <i>MMP13</i>   | CCAGACTTCACGATGGCATTG    | GGCATCTCCTCCATAATTGGC  |
